# Supplementary material for: Structural dynamics of the CROPs domain control stability and toxicity of Paeniclostridium sordellii lethal toxin
Source: PubMed Central journal article supplement (PMC10730571; doi:10.1038/s41467-023-44169-z), 2023-12-19
Supplement: 41467_2023_44169_MOESM3_ESM.pdf [file 41467_2023_44169_MOESM3_ESM.pdf]

## Description of Additional Supplementary Files

**Supplementary Movie 1** : Conformational change of TcsL from open to closed state.
